# Supplementary material
Source: PubMed Central journal article supplement (PMC7192363)
Supplement: NIHMS1579834-supplement-supplementary_material.pdf [file NIHMS1579834-supplement-supplementary_material.pdf]

### SDC Materials and Methods: Screening protocol for Death Certificates

Immediate cause of death was screened for obvious causes of death not related to liver disease. All other cases were referred for secondary review

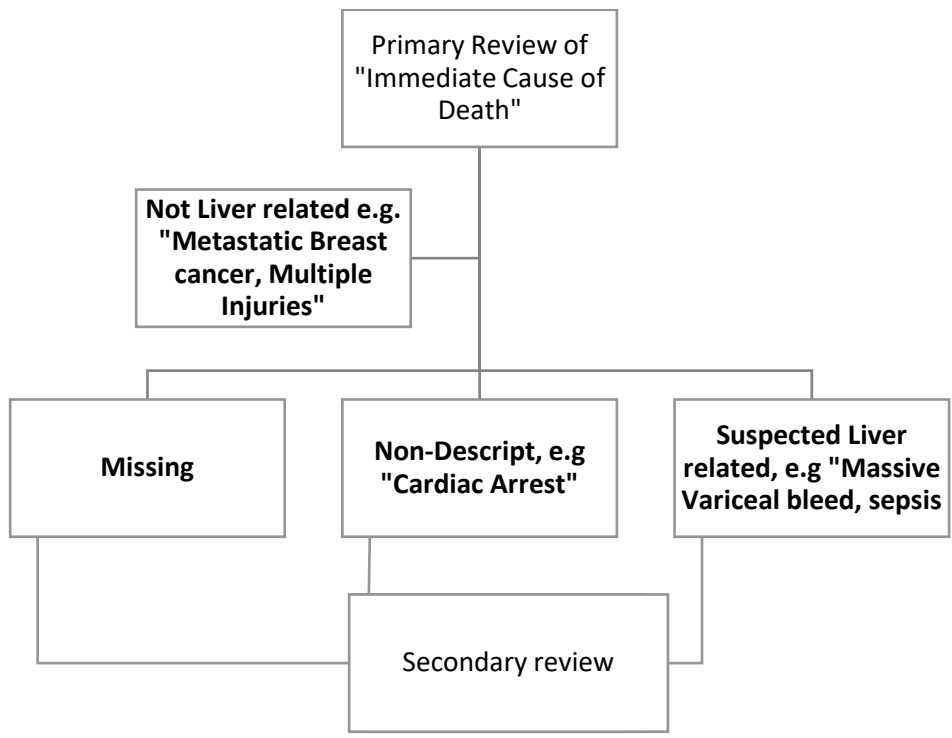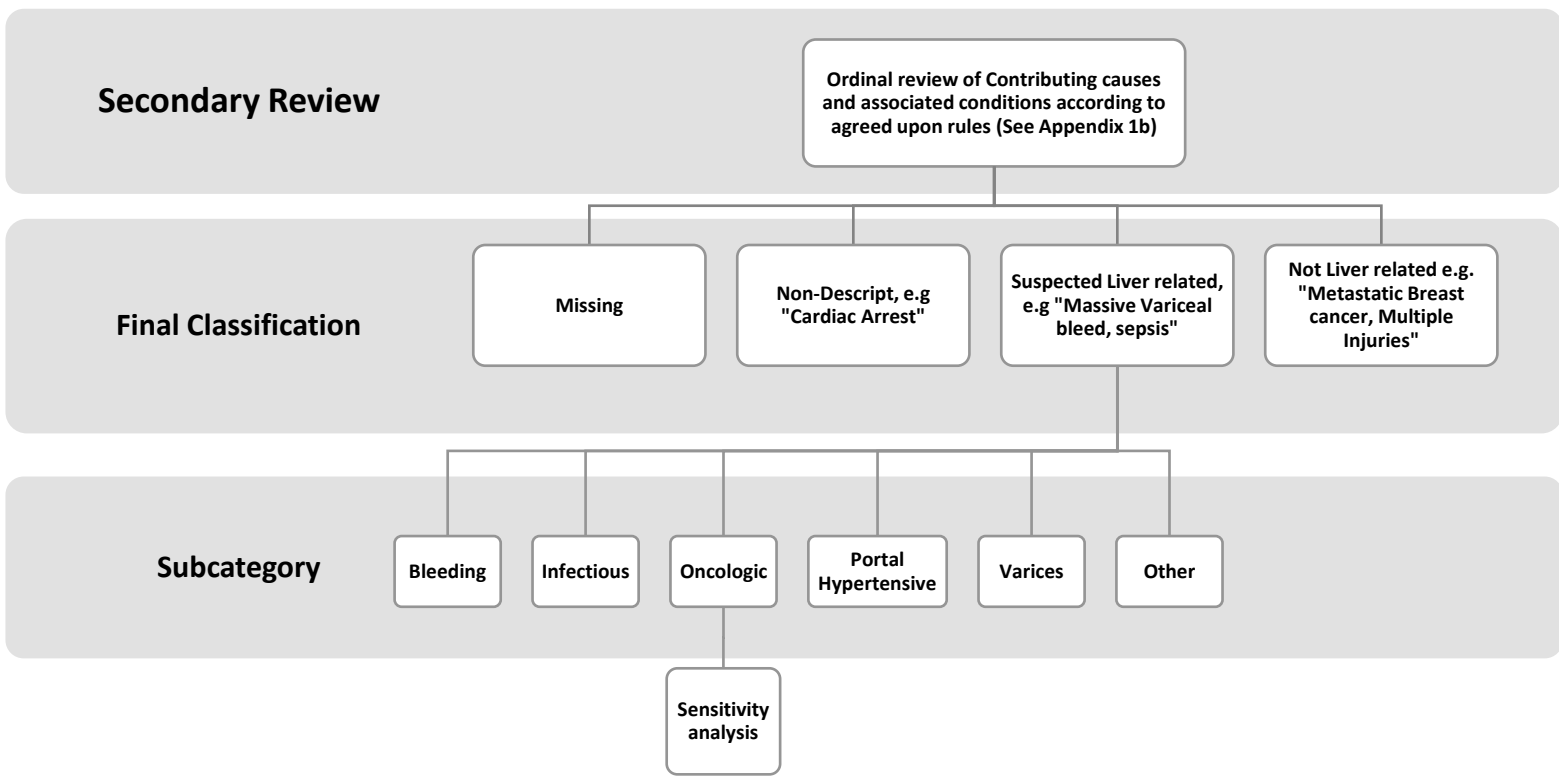

### Rules for Death certificate review<sup>6,13</sup>

Inclusion criteria for the study were a diagnosis code of cirrhosis, so all patients were assumed to have cirrhosis. Items in quotations represent the exact wording of the diagnosis while non-quoted are a summary term.

| Category            | Contains:                                                                                                                                                                          | But NOT                                                                               | Most common examples                                                                                                                                                                      |
|---------------------|------------------------------------------------------------------------------------------------------------------------------------------------------------------------------------|---------------------------------------------------------------------------------------|-------------------------------------------------------------------------------------------------------------------------------------------------------------------------------------------|
| Liver Attributable  |                                                                                                                                                                                    |                                                                                       |                                                                                                                                                                                           |
| Infectious          | Infections (sepsis, ARDS, pneumonia, urosepsis, peritonitis, meningitis, cholangitis) as a liver attributable cause of death                                                       | listed with another non-liver immunosuppressive condition such as AIDS, leukemia, etc | <ol style="list-style-type: none"> <li>1. "Sepsis"</li> <li>2. "Septic Shock"</li> <li>3. "Pneumonia"</li> <li>4. "ARDS"</li> </ol>                                                       |
| Hemorrhagic         | Non-specific bleeding events (hemorrhagic shock, hemoperitoneum). Non-traumatic cerebral hemorrhage IF listed with cirrhosis related coagulopathy or a cirrhosis related diagnosis | Listed with a clearly non-liver condition (e.g. Multiple gun shot wounds)             | <ol style="list-style-type: none"> <li>1. Intracranial hemorrhage</li> <li>2. Hemoperitoneum</li> <li>3. "Hemorrhagic shock"</li> </ol>                                                   |
| Varices             | Mention of massive GI bleeding, or explicit mention of varices                                                                                                                     | Listed with an alternative source of GI bleeding                                      | <ol style="list-style-type: none"> <li>1. Acute variceal bleed</li> <li>2. Severe Upper GI bleed</li> <li>3. Massive GI bleed</li> </ol>                                                  |
| Portal Hypertensive | Hepatic encephalopathy, acute renal failure, or other portal hypertensive complications                                                                                            | Chronic kidney disease                                                                | <ol style="list-style-type: none"> <li>1. Hepatic encephalopathy</li> <li>2. Acute renal failure</li> <li>3. Hepatorenal syndrome</li> </ol>                                              |
| Other               | Mention of cirrhosis                                                                                                                                                               | Any other details                                                                     | <ol style="list-style-type: none"> <li>1. "Cirrhosis"</li> <li>2. "Liver Failure"</li> <li>3. "End stage liver disease"</li> </ol>                                                        |
| Oncologic           | Mention of liver cell carcinoma or cholangiocarcinoma                                                                                                                              | Metastatic disease or tumors in the liver without mention of origin                   | <ol style="list-style-type: none"> <li>1. "Liver Cancer"</li> <li>2. "Hepatocellular Carcinoma"</li> <li>3. "Cholangiocarcinoma"</li> </ol>                                               |
| Non-Liver           | Non-liver diagnosis listed in Immediate cause of death or more highly in contributing conditions                                                                                   |                                                                                       | <ol style="list-style-type: none"> <li>1. Congestive Heart Failure</li> <li>2. Atherosclerotic Heart Disease</li> <li>3. Hypertensive crisis</li> <li>4. Myocardial Infarction</li> </ol> |
| Non-descript        | Missing                                                                                                                                                                            |                                                                                       |                                                                                                                                                                                           |

**Table S1. Death certificate analysis stratified by presence of complication in EHR**

|                                     |                   | No<br>Complications | 1+<br>Complication |        |
|-------------------------------------|-------------------|---------------------|--------------------|--------|
| n                                   |                   | 2963                | 4959               |        |
| Age (mean (SD))                     |                   | 55.08 (11.56)       | 55.05 (11.10)      | 0.903  |
| Female (%)                          |                   | 1332 ( 45.0)        | 1980 ( 40.0)       | <0.001 |
| Race n (%)                          |                   |                     |                    | <0.001 |
|                                     | White             | 1075 ( 36.3)        | 2144 ( 43.2)       |        |
|                                     | Black             | 765 ( 25.8)         | 942 ( 19.0)        |        |
|                                     | Hispanic          | 563 ( 19.0)         | 1127 ( 22.7)       |        |
|                                     | Asian             | 80 ( 2.7)           | 102 ( 2.1)         |        |
|                                     | Other             | 480 ( 16.2)         | 644 ( 13.0)        |        |
| Insurance (%)                       |                   |                     |                    | <0.001 |
|                                     | Medicare/Medicaid | 1123 ( 37.9)        | 2258 ( 45.5)       |        |
|                                     | Private           | 1030 ( 34.8)        | 1491 ( 30.1)       |        |
|                                     | Other             | 810 ( 27.3)         | 1210 ( 24.4)       |        |
| MELD-Na<16                          |                   | 2269 ( 76.6)        | 1730 ( 34.9)       | <0.001 |
| Time at risk in days<br>(mean (SD)) |                   | 1040 (732)          | 901(755)           | <0.001 |
| Deaths n (%)                        |                   | 374 ( 12.6)         | 1763 ( 35.6)       | <0.001 |
| Death Certificate<br>review n (%)   |                   |                     |                    | <0.001 |
|                                     | Liver-related     | 169 ( 45.2)         | 1213 ( 68.8)       |        |
|                                     | Non-descript      | 11 ( 2.9)           | 70 (4.0)           |        |
|                                     | Non-Liver         | 194 ( 51.9)         | 480 ( 27.2)        |        |
| Subclassification<br>n(%)           |                   |                     |                    | 0.134  |
|                                     | Bleeding          | 10 (5.7)            | 44 ( 3.5)          |        |
|                                     | Infectious        | 58 ( 33.3)          | 342 ( 27.4)        |        |
|                                     | Other             | 79 ( 44.9)          | 711 ( 56.9)        |        |
|                                     | Portal HTN        | 17 (9.7)            | 90(7.2)            |        |
|                                     | Varices           | 12 (6.8)            | 62 ( 5.0)          |        |

**Table S2. Death certificate analysis stratified by presence of varices in chart review**

|                                  |                   | No EV           | Varices without bleeding | Varices with bleeding | p      |
|----------------------------------|-------------------|-----------------|--------------------------|-----------------------|--------|
| n                                |                   | 5022            | 2115                     | 785                   |        |
| Age (mean (SD))                  |                   | 55.36 (11.56)   | 55.32 (10.86)            | 52.40 (10.12)         | <0.001 |
| Female (%)                       |                   | 2166 ( 43.2)    | 859 ( 40.7)              | 287 ( 36.6)           | 0.001  |
| Race n (%)                       |                   |                 |                          |                       | <0.001 |
|                                  | White             | 1971 ( 39.2)    | 979 ( 46.3)              | 269 ( 34.3)           |        |
|                                  | Black             | 1247 ( 24.8)    | 319 ( 15.1)              | 141 ( 18.0)           |        |
|                                  | Hispanic          | 897 ( 17.9)     | 511 ( 24.2)              | 282 ( 35.9)           |        |
|                                  | Asian             | 112 ( 2.2)      | 56 ( 2.6)                | 14 ( 1.8)             |        |
|                                  | Other             | 795 ( 15.8)     | 250 ( 11.8)              | 79 ( 10.1)            |        |
| Insurance (%)                    |                   |                 |                          |                       | <0.001 |
|                                  | Medicare/Medicaid | 2055 ( 40.9)    | 1003 ( 47.4)             | 323 ( 41.1)           |        |
|                                  | Private           | 1632 ( 32.5)    | 657 ( 31.1)              | 232 ( 29.6)           |        |
|                                  | Other             | 1335 ( 26.6)    | 455 ( 21.5)              | 230 ( 29.3)           |        |
| MELD-Na<16                       |                   | 3214 ( 64.7)    | 974 ( 47.4)              | 299 ( 39.9)           | <0.001 |
| Time at risk in days (mean (SD)) |                   | 899.64 (734.71) | 1041.80 (769.76)         | 1056.42 (762.33)      | <0.001 |
| Deaths n (%)                     |                   | 1268 ( 25.2)    | 603 ( 28.5)              | 266 ( 33.9)           | <0.001 |
| Death Certificate review n (%)   |                   |                 |                          |                       | <0.001 |
|                                  | Liver-related     | 721 ( 56.9)     | 452 ( 75.0)              | 209 ( 78.6)           |        |
|                                  | Non-descript      | 44 ( 3.5)       | 27 ( 4.5)                | 10 ( 3.8)             |        |
|                                  | Non-Liver         | 503 ( 39.7)     | 124 ( 20.6)              | 47 ( 17.7)            |        |
| Subclassification n(%)           |                   |                 |                          |                       | <0.001 |
|                                  | Bleeding          | 29 ( 3.9)       | 17 ( 3.7)                | 8 ( 3.7)              |        |
|                                  | Infectious        | 232 ( 31.1)     | 120 ( 25.8)              | 48 ( 22.4)            |        |
|                                  | Other             | 396 ( 53.1)     | 275 ( 59.1)              | 119 ( 55.6)           |        |
|                                  | Portal HTN        | 58 ( 7.8)       | 37 ( 8.0)                | 12 ( 5.6)             |        |
|                                  | Varices           | 31 ( 4.2)       | 16 ( 3.4)                | 27 ( 12.6)            |        |
